# Supplementary material for: Transport and storage of anthropogenic C in the Subpolar North Atlantic:Model–Data comparison
Source: Copernicus journal article supplement (doi:10.5194/bg-2016-541), 2017-01-04
Supplement: Supplementary file 1 [file bg-2016-541-supplement.zip]

Archive with 5 entries (5 files):
- FIGS1.pdf
- FIGS2.pdf
- FIGS3.pdf
- FIGS4.pdf
- supplementRacape_etal.pdf
