# Supplementary material for: Transport and storage of anthropogenic C in the Subpolar North Atlantic:Model–Data comparison
Source: Copernicus journal article supplement (doi:10.5194/bg-2016-541), 2017-01-04
Supplement: Supplementary file 1 [file bg-2016-541-supplement.zip › FIGS2.pdf]

$$mT_{\text{Cant}}^{\text{adv}} + mT_{\text{Cant}}^{\text{lf}} + mT_{\text{Cant}}^{\text{eiv}} = mT_{\text{Cant}}^{\text{online}}$$

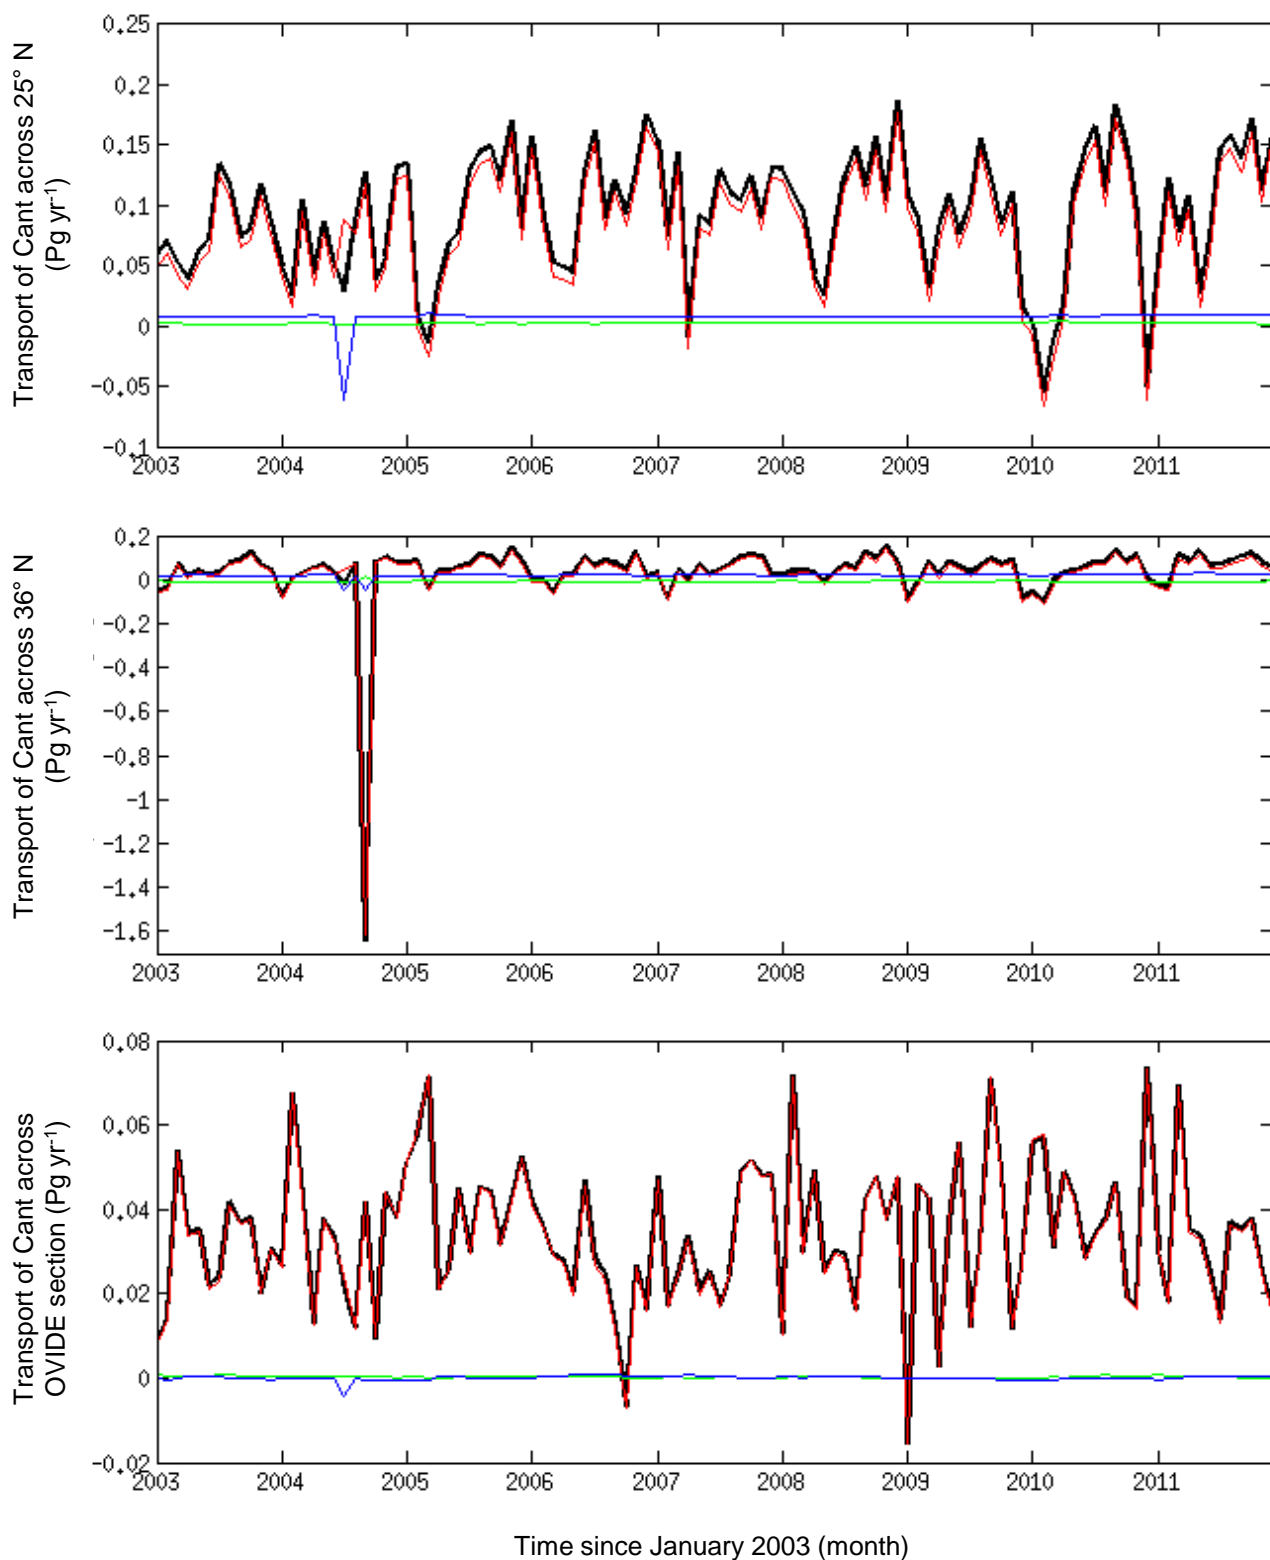

Fig. S2: Transport of Cant across (from top to bottom) 25° N, 36° N and OVIDE sections computed online by ORCA05-PISCES over the period 2003-2011 (monthly resolution). In the online approach, the transport of Cant ( $mT_{\text{Cant}}^{\text{online}}$ , black bold line) is the sum of the advection ( $mT_{\text{Cant}}^{\text{adv}}$ , red fine line), the diffusion ( $mT_{\text{Cant}}^{\text{lf}}$ , blue fine line) and the eddy ( $mT_{\text{Cant}}^{\text{eiv}}$ , green fine line) contribution. For each section,  $mT_{\text{Cant}}^{\text{adv}}$  is the major component of  $mT_{\text{Cant}}^{\text{online}}$ .
