# Supplementary material for: Transport and storage of anthropogenic C in the Subpolar North Atlantic:Model–Data comparison
Source: Copernicus journal article supplement (doi:10.5194/bg-2016-541), 2017-01-04
Supplement: Supplementary file 1 [file bg-2016-541-supplement.zip › FIGS4.pdf]

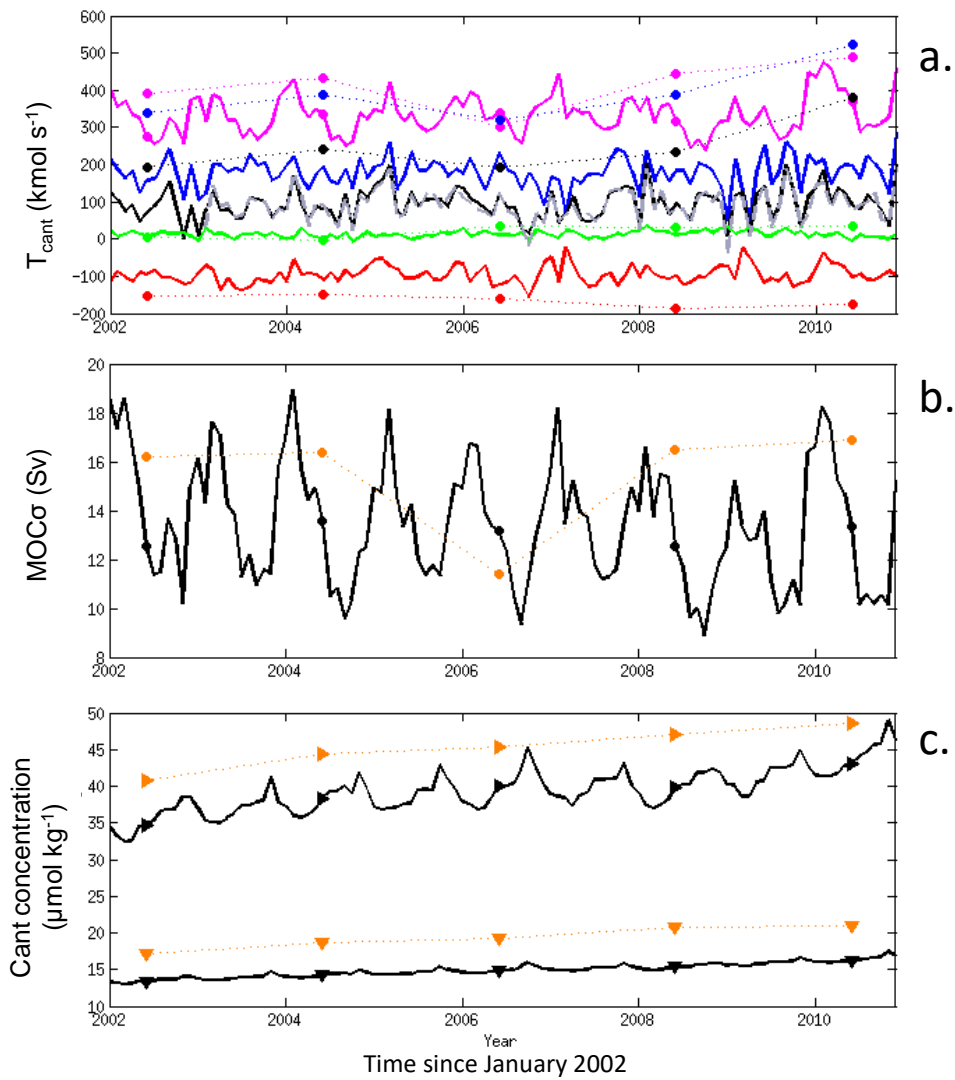

Fig. S4 : Monthly evolution of (a)  $T_{\text{CANT}}^{\circ}$  (magenta) as well as the diapycnal (blue), isopycnal (red), net (green) and total (black) transport of  $C_{\text{ANT}}$  ( $\text{kmol s}^{-1}$ ), (b) the maximal intensity of MOC ( $\text{MOC}\sigma$ , Sv), and (c) the  $C_{\text{ANT}}$  concentration in its upper (triangles) and the lower (inverse triangles) branches ( $\mu\text{mol kg}^{-1}$ ) at the Greenland-Portugal OVIDE section computed offline from monthly averaged model output (continuous line) and compared to estimations derived from the OVIDE data set (dotted line) over the period 2002-2010. Colored dots symbolize the month June. The grey dashed line of panel (a) represents  $C_{\text{ANT}}$  transport across the OVIDE section computed in online by the model (includes advective, diffusive and eddies contributions).
