# Supplementary figures and images for: Transport and storage of anthropogenic C in the Subpolar North Atlantic:Model–Data comparison
Source: Copernicus journal article supplement (doi:10.5194/bg-2016-541), 2017-01-04

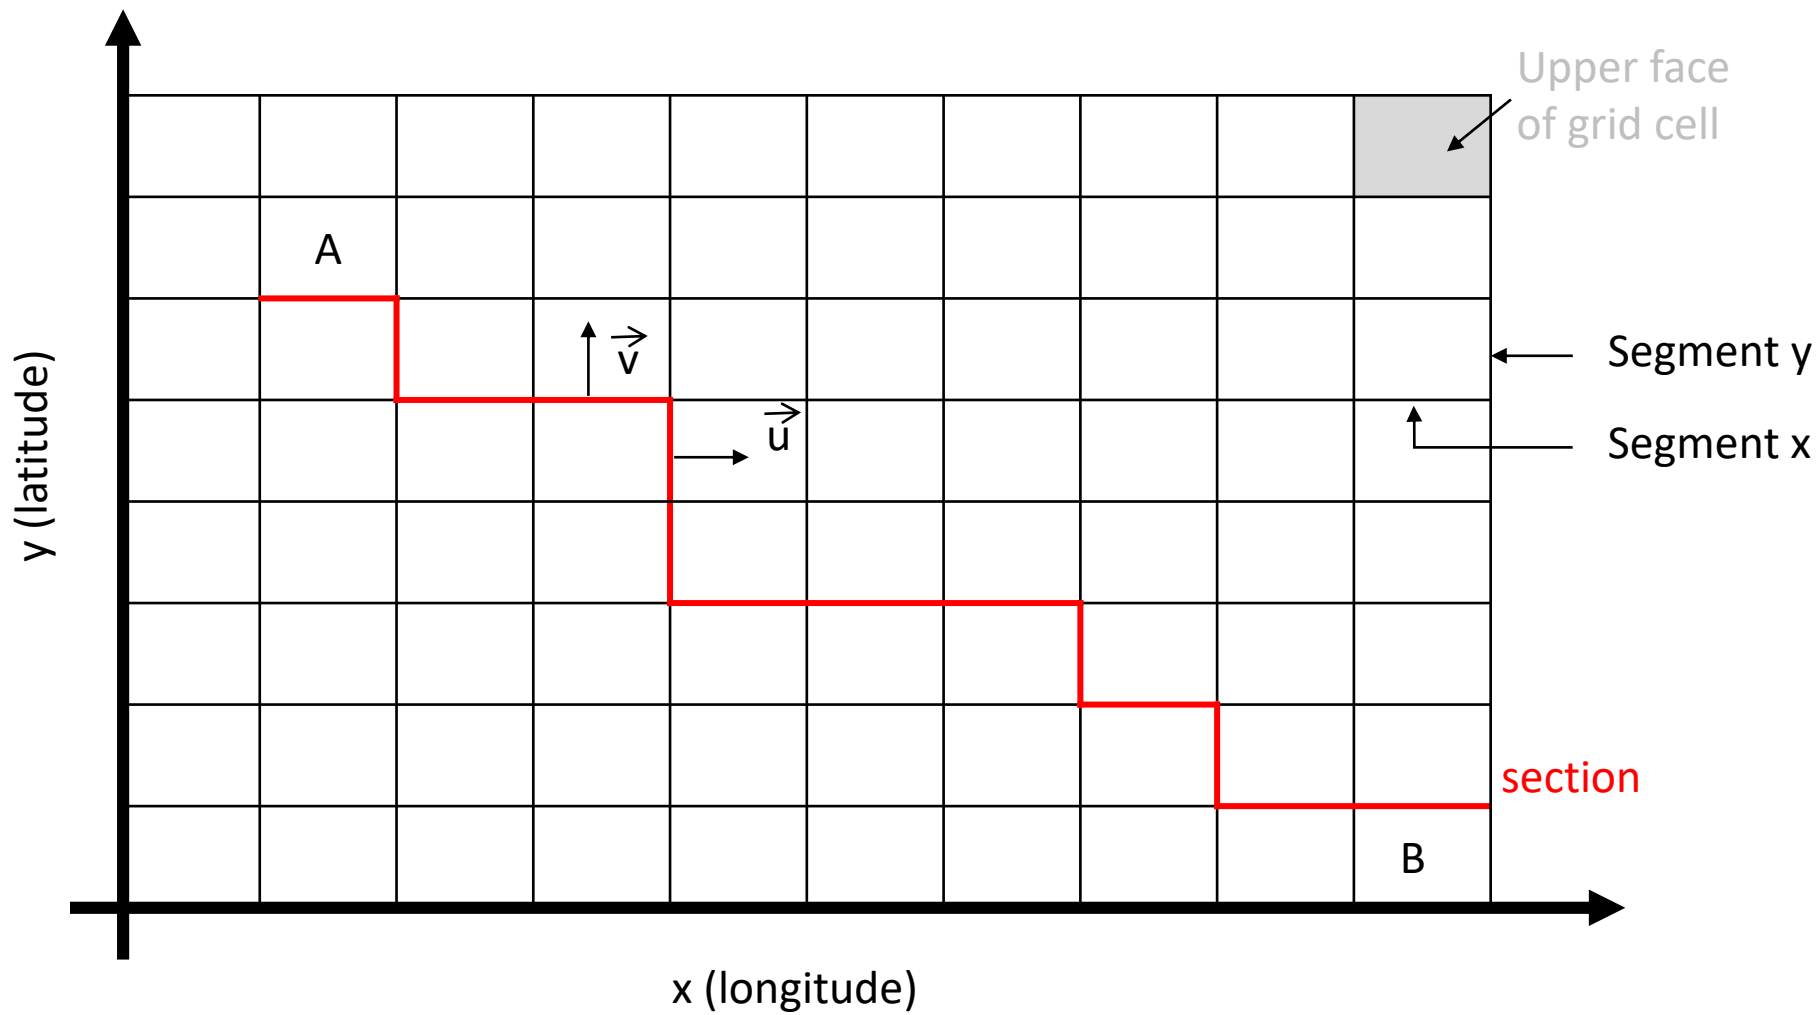

Fig. S1: Schematic representation of the OVIDE section in the model.

Supplement: Supplementary file 1 [file bg-2016-541-supplement.zip › FIGS1.pdf]
